# Supplementary material for: Supramolecular organogels fabricated with dicarboxylic acids and primary alkyl amines: controllable self-assembled structures
Source: Royal Society of Chemistry journal article supplement (doi:10.1039/d0ra05072e), 2020-01-01
Supplement: d0ra05072e1.pdf [file d0ra05072e1.pdf]

## Electronic Supplementary Information (ESI)

### **Supramolecular organogels fabricated with dicarboxylic acids and primary alkyl amines: controllable self-assembled structure**

Lieqiang Liao,<sup>ab‡</sup> Xiang Zhong,<sup>b‡</sup> Xinjian Jia,<sup>b</sup> Caiyun Liao,<sup>b</sup> Jinlian Zhong,<sup>b</sup> Shunmin Ding,<sup>a</sup> Chao Chen,<sup>\*a</sup> Sanguo Hong<sup>\*a</sup> and Xuzhong Luo<sup>\*b</sup>

<sup>a</sup> Key Laboratory of Jiangxi Province for Environment and Energy Catalysis, College of Chemistry, Nanchang University, Nanchang 330031, P. R. China. E-mail: chaochen@ncu.edu.cn; honganguo2020@163.com

<sup>b</sup> Key Laboratory of Organo-Pharmaceutical Chemistry of Jiangxi Province, College of Chemistry and Chemical Engineering, Gannan Normal University, Ganzhou 341000, P. R. China. E-mail: luoxuzhong@hotmail.com

<sup>‡</sup> These authors contributed equally to this work.

**Table S1.** Gelation data of dicarboxylic acids.

| Number | Solvents                        |          | Dicarboxylic acids |     |     |     |
|--------|---------------------------------|----------|--------------------|-----|-----|-----|
|        | Name                            | Polarity | TBA                | ODA | IDA | PDA |
| 1      | H <sub>2</sub> O                | SP       | S                  | S   | S   | S   |
| 2      | DMSO                            | SP       | I                  | S   | I   | S   |
| 3      | Ethylene glycol                 | SP       | I                  | S   | I   | S   |
| 4      | Methanol                        | SP       | I                  | S   | I   | S   |
| 5      | Ethanol                         | SP       | I                  | S   | I   | S   |
| 6      | <i>n</i> -Amyl alcohol          | MP       | I                  | S   | I   | S   |
| 7      | Aminobenzene                    | SP       | I                  | S   | I   | S   |
| 8      | DMF                             | SP       | I                  | S   | I   | S   |
| 9      | <i>o</i> -Xylene                | MP       | I                  | I   | I   | I   |
| 10     | <i>m</i> -Xylene                | MP       | I                  | I   | I   | I   |
| 11     | Mesitylene                      | MP       | I                  | I   | I   | I   |
| 12     | Nitrobenzene                    | MP       | I                  | I   | I   | I   |
| 13     | Tetralin                        | MP       | I                  | I   | I   | I   |
| 14     | <i>n</i> -Butyl methacrylate    | MP       | I                  | I   | I   | I   |
| 15     | CH <sub>2</sub> Cl <sub>2</sub> | MP       | I                  | I   | I   | I   |
| 16     | Pyridine                        | MP       | I                  | S   | I   | S   |
| 17     | CHCl <sub>3</sub>               | MP       | I                  | I   | I   | I   |
| 18     | Ethyl acetate                   | MP       | I                  | S   | I   | S   |
| 19     | <i>o</i> -Dichlorobenzene       | MP       | I                  | I   | I   | I   |
| 20     | Tetrahydrofuran                 | MP       | I                  | I   | I   | I   |
| 21     | Chlorobenzene                   | MP       | I                  | I   | I   | I   |
| 22     | Aether                          | MP       | I                  | I   | I   | I   |
| 23     | Benzene                         | MP       | I                  | I   | I   | I   |
| 24     | Isopropyl ether                 | MP       | I                  | I   | I   | I   |
| 25     | <i>p</i> -Xylene                | MP       | I                  | I   | I   | I   |
| 26     | Toluene                         | MP       | I                  | I   | I   | I   |
| 27     | Triethylamine                   | MP       | I                  | S   | I   | I   |
| 28     | Triethanolamine                 | MP       | S                  | I   | S   | I   |
| 29     | CCl <sub>4</sub>                | WP       | I                  | I   | I   | I   |
| 30     | Cyclohexane                     | WP       | I                  | I   | I   | I   |
| 31     | Petroleum ether                 | WP       | I                  | I   | I   | I   |

\* S = solution; I = insoluble. SP = strong polarity; MP = medium polarity; WP = weakly polarity.

**Table S2.** Gelation data of dicarboxylic acids.

|    | Solvents                        | Dicarboxylic acids |     |     |     |
|----|---------------------------------|--------------------|-----|-----|-----|
|    |                                 | TDA                | TPA | DPA | EDA |
| 1  | H <sub>2</sub> O                | S                  | S   | S   | S   |
| 2  | DMSO                            | S                  | S   | S   | S   |
| 3  | Ethylene glycol                 | S                  | S   | S   | S   |
| 4  | Methanol                        | S                  | S   | S   | S   |
| 5  | Ethanol                         | S                  | S   | S   | S   |
| 6  | <i>n</i> -Amyl alcohol          | S                  | S   | S   | S   |
| 7  | Aminobenzene                    | S                  | S   | S   | S   |
| 8  | DMF                             | S                  | S   | S   | S   |
| 9  | <i>o</i> -Xylene                | I                  | I   | I   | I   |
| 10 | <i>m</i> -Xylene                | I                  | I   | I   | I   |
| 11 | Mesitylene                      | I                  | I   | I   | I   |
| 12 | Nitrobenzene                    | S                  | S   | S   | S   |
| 13 | Tetralin                        | I                  | I   | I   | S   |
| 14 | <i>n</i> -Butyl methacrylate    | I                  | S   | S   | S   |
| 15 | CH <sub>2</sub> Cl <sub>2</sub> | I                  | I   | I   | I   |
| 16 | Pyridine                        | S                  | S   | S   | S   |
| 17 | CHCl <sub>3</sub>               | I                  | I   | I   | I   |
| 18 | Ethyl acetate                   | I                  | I   | I   | I   |
| 19 | <i>o</i> -Dichlorobenzene       | I                  | I   | I   | I   |
| 20 | Tetrahydrofuran                 | I                  | I   | I   | I   |
| 21 | Chlorobenzene                   | I                  | I   | I   | I   |
| 22 | Aether                          | I                  | I   | S   | S   |
| 23 | Benzene                         | I                  | I   | I   | I   |
| 24 | Isopropyl ether                 | I                  | I   | I   | I   |
| 25 | <i>p</i> -Xylene                | I                  | I   | I   | I   |
| 26 | Toluene                         | I                  | I   | I   | I   |
| 27 | Triethylamine                   | S                  | S   | S   | S   |
| 28 | Triethanolamine                 | S                  | S   | S   | S   |
| 29 | CCl <sub>4</sub>                | I                  | I   | I   | I   |
| 30 | Cyclohexane                     | I                  | I   | I   | I   |
| 31 | Petroleum ether                 | I                  | I   | I   | I   |

\* S = solution; I = insoluble.

**Table S3.** Gelation data of primary alkyl amine R-NH<sub>2</sub> ( R<sub>12</sub>, R<sub>14</sub>, R<sub>16</sub>, R<sub>18</sub>).

|    | Solvents                        | R-NH <sub>2</sub> |                 |                 |                 |
|----|---------------------------------|-------------------|-----------------|-----------------|-----------------|
|    |                                 | R <sub>12</sub>   | R <sub>14</sub> | R <sub>16</sub> | R <sub>18</sub> |
| 1  | H <sub>2</sub> O                | I                 | I               | I               | I               |
| 2  | DMSO                            | S                 | S               | S               | P               |
| 3  | Ethylene glycol                 | S                 | S               | S               | P               |
| 4  | Methanol                        | S                 | S               | S               | S               |
| 5  | Ethanol                         | S                 | S               | S               | S               |
| 6  | <i>n</i> -Amyl alcohol          | S                 | S               | S               | S               |
| 7  | Aminobenzene                    | S                 | P               | P               | P               |
| 8  | DMF                             | S                 | P               | P               | P               |
| 9  | <i>o</i> -Xylene                | S                 | S               | S               | P               |
| 10 | <i>m</i> -Xylene                | S                 | S               | S               | P               |
| 11 | Mesitylene                      | S                 | S               | S               | P               |
| 12 | Nitrobenzene                    | S                 | S               | S               | P               |
| 13 | Tetralin                        | S                 | S               | S               | S               |
| 14 | <i>n</i> -Butyl methacrylate    | S                 | P               | P               | P               |
| 15 | CH <sub>2</sub> Cl <sub>2</sub> | S                 | S               | S               | S               |
| 16 | Pyridine                        | S                 | P               | P               | P               |
| 17 | CHCl <sub>3</sub>               | S                 | S               | S               | S               |
| 18 | Ethyl acetate                   | S                 | S               | S               | S               |
| 19 | <i>o</i> -Dichlorobenzene       | S                 | S               | S               | S               |
| 20 | Tetrahydrofuran                 | S                 | P               | P               | P               |
| 21 | Chlorobenzene                   | S                 | S               | S               | S               |
| 22 | Aether                          | S                 | P               | P               | P               |
| 23 | Benzene                         | S                 | S               | S               | S               |
| 24 | Isopropyl ether                 | S                 | S               | P               | P               |
| 25 | <i>p</i> -Xylene                | S                 | S               | S               | S               |
| 26 | Toluene                         | S                 | S               | S               | S               |
| 27 | Triethylamine                   | S                 | P               | P               | P               |
| 28 | Triethanolamine                 | S                 | P               | P               | P               |
| 29 | CCl <sub>4</sub>                | S                 | P               | P               | P               |
| 30 | Cyclohexane                     | S                 | S               | S               | S               |
| 31 | Petroleum ether                 | S                 | S               | S               | S               |

\* S = solution; P = precipitate; I = insoluble.

**Table S4.** Gelation data of TBA-R<sub>12</sub>, TBA-R<sub>14</sub>, TBA-R<sub>16</sub> and TBA-R<sub>18</sub>.

|    | Solvents                        | TBA-R <sub>n</sub>  |                     |                     |                     |
|----|---------------------------------|---------------------|---------------------|---------------------|---------------------|
|    |                                 | TBA-R <sub>12</sub> | TBA-R <sub>14</sub> | TBA-R <sub>16</sub> | TBA-R <sub>18</sub> |
| 1  | H <sub>2</sub> O                | S                   | P                   | P                   | S                   |
| 2  | DMSO                            | S                   | S                   | S                   | S                   |
| 3  | Ethylene glycol                 | I                   | S                   | S                   | S                   |
| 4  | Methanol                        | I                   | I                   | I                   | I                   |
| 5  | Ethanol                         | I                   | P                   | P                   | I                   |
| 6  | <i>n</i> -Amyl alcohol          | I                   | I                   | I                   | I                   |
| 7  | Aminobenzene                    | I                   | S                   | S                   | S                   |
| 8  | DMF                             | S                   | S                   | S                   | I                   |
| 9  | <i>o</i> -Xylene                | I                   | I                   | I                   | I                   |
| 10 | <i>m</i> -Xylene                | I                   | I                   | I                   | I                   |
| 11 | Mesitylene                      | I                   | I                   | I                   | I                   |
| 12 | Nitrobenzene                    | I                   | I                   | I                   | I                   |
| 13 | Tetralin                        | I                   | I                   | I                   | I                   |
| 14 | <i>n</i> -Butyl methacrylate    | I                   | I                   | I                   | I                   |
| 15 | CH <sub>2</sub> Cl <sub>2</sub> | I                   | I                   | I                   | I                   |
| 16 | Pyridine                        | I                   | I                   | I                   | I                   |
| 17 | CHCl <sub>3</sub>               | I                   | P                   | P                   | I                   |
| 18 | Ethyl acetate                   | I                   | I                   | I                   | I                   |
| 19 | <i>o</i> -Dichlorobenzene       | I                   | I                   | I                   | I                   |
| 20 | Tetrahydrofuran                 | I                   | I                   | I                   | I                   |
| 21 | Chlorobenzene                   | I                   | I                   | I                   | I                   |
| 22 | Aether                          | I                   | I                   | I                   | I                   |
| 23 | Benzene                         | I                   | I                   | I                   | I                   |
| 24 | Isopropyl ether                 | I                   | P                   | P                   | I                   |
| 25 | <i>p</i> -Xylene                | I                   | I                   | I                   | I                   |
| 26 | Toluene                         | I                   | I                   | I                   | I                   |
| 27 | Triethylamine                   | I                   | P                   | P                   | I                   |
| 28 | Triethanolamine                 | I                   | I                   | I                   | I                   |
| 29 | CCl <sub>4</sub>                | I                   | I                   | I                   | I                   |
| 30 | Cyclohexane                     | I                   | I                   | I                   | I                   |
| 31 | Petroleum ether                 | I                   | I                   | I                   | I                   |

\* S = solution; P = precipitate; I = insoluble.

**Table S5.** Gelation data of ODA-R<sub>12</sub>, ODA-R<sub>14</sub>, ODA-R<sub>16</sub> and ODA-R<sub>18</sub>.

|    | Solvents                        | ODA-R <sub>n</sub>  |                     |                     |                     |
|----|---------------------------------|---------------------|---------------------|---------------------|---------------------|
|    |                                 | ODA-R <sub>12</sub> | ODA-R <sub>14</sub> | ODA-R <sub>16</sub> | ODA-R <sub>18</sub> |
| 1  | H <sub>2</sub> O                | P                   | P                   | P                   | P                   |
| 2  | DMSO                            | P                   | P                   | P                   | P                   |
| 3  | Ethylene glycol                 | S                   | P                   | P                   | P                   |
| 4  | Methanol                        | S                   | S                   | S                   | P                   |
| 5  | Ethanol                         | S                   | P                   | P                   | P                   |
| 6  | <i>n</i> -Amyl alcohol          | S                   | P                   | P                   | P                   |
| 7  | Aminobenzene                    | P                   | P                   | P                   | S                   |
| 8  | DMF                             | P                   | P                   | P                   | P                   |
| 9  | <i>o</i> -Xylene                | P                   | P                   | P                   | I                   |
| 10 | <i>m</i> -Xylene                | P                   | P                   | P                   | I                   |
| 11 | Mesitylene                      | P                   | P                   | P                   | I                   |
| 12 | Nitrobenzene                    | S                   | S                   | S                   | I                   |
| 13 | Tetralin                        | S                   | S                   | S                   | I                   |
| 14 | <i>n</i> -Butyl methacrylate    | P                   | P                   | P                   | S                   |
| 15 | CH <sub>2</sub> Cl <sub>2</sub> | P                   | I                   | I                   | I                   |
| 16 | Pyridine                        | P                   | P                   | P                   | S                   |
| 17 | CHCl <sub>3</sub>               | P                   | I                   | I                   | I                   |
| 18 | Ethyl acetate                   | P                   | I                   | I                   | I                   |
| 19 | <i>o</i> -Dichlorobenzene       | S                   | S                   | S                   | S                   |
| 20 | Tetrahydrofuran                 | P                   | P                   | P                   | P                   |
| 21 | Chlorobenzene                   | S                   | S                   | S                   | S                   |
| 22 | Aether                          | I                   | I                   | I                   | I                   |
| 23 | Benzene                         | I                   | I                   | I                   | I                   |
| 24 | Isopropyl ether                 | I                   | I                   | I                   | P                   |
| 25 | <i>p</i> -Xylene                | I                   | I                   | I                   | I                   |
| 26 | Toluene                         | I                   | I                   | I                   | I                   |
| 27 | Triethylamine                   | P                   | P                   | P                   | S                   |
| 28 | Triethanolamine                 | S                   | S                   | S                   | S                   |
| 29 | CCl <sub>4</sub>                | S                   | S                   | S                   | S                   |
| 30 | Cyclohexane                     | I                   | I                   | I                   | I                   |
| 31 | Petroleum ether                 | P                   | I                   | I                   | I                   |

\* S = solution; P = precipitate; I = insoluble.

**Table S6.** Gelation data of IDA-R<sub>12</sub>, IDA-R<sub>14</sub>, IDA-R<sub>16</sub> and IDA-R<sub>18</sub>.

| Solvents                           | IDA-R <sub>n</sub>  |                     |                     |                     |
|------------------------------------|---------------------|---------------------|---------------------|---------------------|
|                                    | IDA-R <sub>12</sub> | IDA-R <sub>14</sub> | IDA-R <sub>16</sub> | IDA-R <sub>18</sub> |
| 1 H <sub>2</sub> O                 | I                   | S                   | P                   | S                   |
| 2 DMSO                             | P                   | I                   | P                   | P                   |
| 3 Ethylene glycol                  | I                   | I                   | I                   | I                   |
| 4 Methanol                         | I                   | I                   | I                   | I                   |
| 5 Ethanol                          | I                   | I                   | I                   | I                   |
| 6 <i>n</i> -Amyl alcohol           | I                   | P                   | I                   | P                   |
| 7 Aminobenzene                     | I                   | I                   | I                   | I                   |
| 8 DMF                              | I                   | I                   | S                   | I                   |
| 9 <i>o</i> -Xylene                 | I                   | I                   | I                   | I                   |
| 10 <i>m</i> -Xylene                | I                   | I                   | I                   | I                   |
| 11 Mesitylene                      | I                   | I                   | I                   | I                   |
| 12 Nitrobenzene                    | I                   | I                   | I                   | I                   |
| 13 Tetralin                        | I                   | I                   | I                   | I                   |
| 14 <i>n</i> -Butyl methacrylate    | I                   | P                   | I                   | P                   |
| 15 CH <sub>2</sub> Cl <sub>2</sub> | I                   | I                   | I                   | I                   |
| 16 Pyridine                        | P                   | I                   | I                   | I                   |
| 17 CHCl <sub>3</sub>               | I                   | P                   | I                   | P                   |
| 18 Ethyl acetate                   | I                   | I                   | I                   | I                   |
| 19 <i>o</i> -Dichlorobenzene       | I                   | I                   | I                   | I                   |
| 20 Tetrahydrofuran                 | I                   | I                   | I                   | I                   |
| 21 Chlorobenzene                   | I                   | I                   | I                   | I                   |
| 22 Aether                          | I                   | I                   | I                   | I                   |
| 23 Benzene                         | I                   | I                   | I                   | I                   |
| 24 Isopropyl ether                 | I                   | P                   | I                   | P                   |
| 25 <i>p</i> -Xylene                | I                   | I                   | I                   | I                   |
| 26 Toluene                         | I                   | I                   | I                   | I                   |
| 27 Triethylamine                   | I                   | I                   | I                   | P                   |
| 28 Triethanolamine                 | I                   | I                   | I                   | I                   |
| 29 CCl <sub>4</sub>                | I                   | P                   | I                   | I                   |
| 30 Cyclohexane                     | I                   | I                   | I                   | I                   |
| 31 Petroleum ether                 | I                   | I                   | I                   | P                   |

\* S = solution; P = precipitate; I = insoluble.

**Table S7.** Gelation data of PDA-R<sub>12</sub>, PDA-R<sub>14</sub>, PDA-R<sub>16</sub> and PDA-R<sub>18</sub>.

| Solvents                           | PDA-R <sub>n</sub>  |                     |                     |                     |
|------------------------------------|---------------------|---------------------|---------------------|---------------------|
|                                    | PDA-R <sub>12</sub> | PDA-R <sub>14</sub> | PDA-R <sub>16</sub> | PDA-R <sub>18</sub> |
| 1 H <sub>2</sub> O                 | S                   | S                   | I                   | I                   |
| 2 DMSO                             | S                   | G                   | G                   | G                   |
| 3 Ethylene glycol                  | S                   | S                   | G                   | G                   |
| 4 Methanol                         | S                   | S                   | S                   | S                   |
| 5 Ethanol                          | S                   | S                   | P                   | G                   |
| 6 <i>n</i> -Amyl alcohol           | S                   | S                   | S                   | G                   |
| 7 Aminobenzene                     | G                   | G                   | S                   | S                   |
| 8 DMF                              | S                   | S                   | G                   | G                   |
| 9 <i>o</i> -Xylene                 | S                   | S                   | S                   | P                   |
| 10 <i>m</i> -Xylene                | S                   | G                   | G                   | G                   |
| 11 Mesitylene                      | S                   | S                   | G                   | S                   |
| 12 Nitrobenzene                    | S                   | S                   | S                   | G                   |
| 13 Tetralin                        | P                   | G                   | S                   | G                   |
| 14 <i>n</i> -Butyl methacrylate    | P                   | P                   | G                   | G                   |
| 15 CH <sub>2</sub> Cl <sub>2</sub> | P                   | S                   | S                   | P                   |
| 16 Pyridine                        | P                   | P                   | S                   | S                   |
| 17 CHCl <sub>3</sub>               | S                   | S                   | S                   | S                   |
| 18 Ethyl acetate                   | P                   | P                   | I                   | I                   |
| 19 <i>o</i> -Dichlorobenzene       | P                   | S                   | G                   | S                   |
| 20 Tetrahydrofuran                 | P                   | S                   | I                   | S                   |
| 21 Chlorobenzene                   | S                   | S                   | G                   | S                   |
| 22 Aether                          | I                   | P                   | I                   | P                   |
| 23 Benzene                         | S                   | S                   | G                   | S                   |
| 24 Isopropyl ether                 | I                   | P                   | I                   | I                   |
| 25 <i>p</i> -Xylene                | S                   | S                   | G                   | G                   |
| 26 Toluene                         | S                   | S                   | G                   | S                   |
| 27 Triethylamine                   | S                   | S                   | G                   | S                   |
| 28 Triethanolamine                 | S                   | S                   | S                   | S                   |
| 29 CCl <sub>4</sub>                | S                   | S                   | S                   | S                   |
| 30 Cyclohexane                     | P                   | I                   | G                   | S                   |
| 31 Petroleum ether                 | I                   | I                   | I                   | I                   |

\* G = gel; S = solution; P = precipitate; I = insoluble.



**Table S8.** Gelation data of TDA-R<sub>12</sub>, TDA-R<sub>14</sub>, TDA-R<sub>16</sub> and TDA-R<sub>18</sub>.

| Solvents                           | TDA-R <sub>n</sub>  |                     |                     |                     |
|------------------------------------|---------------------|---------------------|---------------------|---------------------|
|                                    | TDA-R <sub>12</sub> | TDA-R <sub>14</sub> | TDA-R <sub>16</sub> | TDA-R <sub>18</sub> |
| 1 H <sub>2</sub> O                 | I                   | I                   | I                   | I                   |
| 2 DMSO                             | S                   | S                   | S                   | S                   |
| 3 Ethylene glycol                  | S                   | G                   | G                   | G                   |
| 4 Methanol                         | S                   | G                   | G                   | G                   |
| 5 Ethanol                          | S                   | S                   | S                   | S                   |
| 6 <i>n</i> -Amyl alcohol           | S                   | S                   | S                   | S                   |
| 7 Aminobenzene                     | S                   | S                   | S                   | S                   |
| 8 DMF                              | S                   | S                   | S                   | S                   |
| 9 <i>o</i> -Xylene                 | S                   | S                   | S                   | S                   |
| 10 <i>m</i> -Xylene                | S                   | S                   | S                   | S                   |
| 11 Mesitylene                      | S                   | S                   | S                   | S                   |
| 12 Nitrobenzene                    | S                   | S                   | S                   | S                   |
| 13 Tetralin                        | S                   | S                   | S                   | S                   |
| 14 <i>n</i> -Butyl methacrylate    | S                   | S                   | S                   | S                   |
| 15 CH <sub>2</sub> Cl <sub>2</sub> | S                   | S                   | S                   | S                   |
| 16 Pyridine                        | S                   | S                   | S                   | S                   |
| 17 CHCl <sub>3</sub>               | S                   | S                   | S                   | S                   |
| 18 Ethyl acetate                   | G                   | G                   | G                   | G                   |
| 19 <i>o</i> -Dichlorobenzene       | S                   | S                   | S                   | S                   |
| 20 Tetrahydrofuran                 | G                   | G                   | G                   | G                   |
| 21 Chlorobenzene                   | S                   | S                   | S                   | S                   |
| 22 Aether                          | P                   | P                   | P                   | P                   |
| 23 Benzene                         | G                   | G                   | G                   | G                   |
| 24 Isopropyl ether                 | S                   | S                   | S                   | S                   |
| 25 <i>p</i> -Xylene                | G                   | G                   | G                   | G                   |
| 26 Toluene                         | G                   | G                   | G                   | G                   |
| 27 Triethylamine                   | S                   | S                   | S                   | S                   |
| 28 Triethanolamine                 | S                   | S                   | S                   | S                   |
| 29 CCl <sub>4</sub>                | S                   | S                   | S                   | S                   |
| 30 Cyclohexane                     | G                   | G                   | G                   | G                   |
| 31 Petroleum ether                 | G                   | G                   | G                   | G                   |

\* G = gel; S = solution; P = precipitate; I = insoluble.

**Table S9.** Gelation data of TPA-R<sub>12</sub>, TPA-R<sub>14</sub>, TPA-R<sub>16</sub> and TPA-R<sub>18</sub>.

| Solvents                           | TPA-R <sub>n</sub>  |                     |                     |                     |
|------------------------------------|---------------------|---------------------|---------------------|---------------------|
|                                    | TPA-R <sub>12</sub> | TPA-R <sub>14</sub> | TPA-R <sub>16</sub> | TPA-R <sub>18</sub> |
| 1 H <sub>2</sub> O                 | I                   | I                   | I                   | I                   |
| 2 DMSO                             | S                   | G                   | G                   | G                   |
| 3 Ethylene glycol                  | G                   | G                   | G                   | G                   |
| 4 Methanol                         | S                   | G                   | G                   | G                   |
| 5 Ethanol                          | S                   | G                   | G                   | G                   |
| 6 <i>n</i> -Amyl alcohol           | S                   | G                   | G                   | G                   |
| 7 Aminobenzene                     | S                   | G                   | G                   | G                   |
| 8 DMF                              | S                   | S                   | S                   | S                   |
| 9 <i>o</i> -Xylene                 | S                   | S                   | S                   | S                   |
| 10 <i>m</i> -Xylene                | S                   | S                   | S                   | S                   |
| 11 Mesitylene                      | S                   | S                   | S                   | S                   |
| 12 Nitrobenzene                    | S                   | S                   | S                   | S                   |
| 13 Tetralin                        | S                   | S                   | S                   | S                   |
| 14 <i>n</i> -Butyl methacrylate    | G                   | G                   | G                   | G                   |
| 15 CH <sub>2</sub> Cl <sub>2</sub> | G                   | G                   | G                   | G                   |
| 16 Pyridine                        | G                   | G                   | G                   | G                   |
| 17 CHCl <sub>3</sub>               | S                   | S                   | S                   | S                   |
| 18 Ethyl acetate                   | S                   | S                   | S                   | S                   |
| 19 <i>o</i> -Dichlorobenzene       | G                   | G                   | G                   | G                   |
| 20 Tetrahydrofuran                 | G                   | G                   | G                   | G                   |
| 21 Chlorobenzene                   | G                   | G                   | G                   | G                   |
| 22 Aether                          | G                   | G                   | G                   | G                   |
| 23 Benzene                         | G                   | G                   | G                   | G                   |
| 24 Isopropyl ether                 | S                   | S                   | S                   | S                   |
| 25 <i>p</i> -Xylene                | G                   | G                   | G                   | G                   |
| 26 Toluene                         | G                   | G                   | G                   | G                   |
| 27 Triethylamine                   | S                   | S                   | S                   | S                   |
| 28 Triethanolamine                 | S                   | S                   | S                   | S                   |
| 29 CCl <sub>4</sub>                | G                   | G                   | G                   | G                   |
| 30 Cyclohexane                     | G                   | G                   | G                   | G                   |
| 31 Petroleum ether                 | S                   | S                   | S                   | S                   |

\* G = gel; S = solution; P = precipitate; I = insoluble.

**Table S10.** Gelation data of EDA-R<sub>12</sub>, EDA-R<sub>14</sub>, EDA-R<sub>16</sub> and EDA-R<sub>18</sub>.

| Solvents                           | EDA-R <sub>n</sub>  |                     |                     |                     |
|------------------------------------|---------------------|---------------------|---------------------|---------------------|
|                                    | EDA-R <sub>18</sub> | EDA-R <sub>16</sub> | EDA-R <sub>14</sub> | EDA-R <sub>12</sub> |
| 1 H <sub>2</sub> O                 | I                   | I                   | I                   | I                   |
| 2 DMSO                             | G                   | G                   | G                   | S                   |
| 3 Ethylene glycol                  | G                   | G                   | G                   | S                   |
| 4 Methanol                         | G                   | G                   | S                   | S                   |
| 5 Ethanol                          | G                   | G                   | S                   | S                   |
| 6 <i>n</i> -Amyl alcohol           | G                   | G                   | G                   | S                   |
| 7 Aminobenzene                     | G                   | G                   | G                   | S                   |
| 8 DMF                              | G                   | G                   | G                   | S                   |
| 9 <i>o</i> -Xylene                 | P                   | S                   | S                   | S                   |
| 10 <i>m</i> -Xylene                | P                   | S                   | S                   | S                   |
| 11 Mesitylene                      | P                   | S                   | S                   | S                   |
| 12 Nitrobenzene                    | G                   | G                   | G                   | S                   |
| 13 Tetralin                        | P                   | S                   | S                   | S                   |
| 14 <i>n</i> -Butyl methacrylate    | G                   | G                   | G                   | S                   |
| 15 CH <sub>2</sub> Cl <sub>2</sub> | P                   | P                   | P                   | P                   |
| 16 Pyridine                        | G                   | G                   | G                   | S                   |
| 17 CHCl <sub>3</sub>               | S                   | S                   | S                   | S                   |
| 18 Ethyl acetate                   | P                   | P                   | P                   | P                   |
| 19 <i>o</i> -Dichlorobenzene       | G                   | G                   | G                   | S                   |
| 20 Tetrahydrofuran                 | G                   | G                   | G                   | P                   |
| 21 Chlorobenzene                   | G                   | G                   | G                   | S                   |
| 22 Aether                          | I                   | I                   | I                   | I                   |
| 23 Benzene                         | P                   | S                   | S                   | S                   |
| 24 Isopropyl ether                 | G                   | G                   | G                   | P                   |
| 25 <i>p</i> -Xylene                | P                   | S                   | S                   | S                   |
| 26 Toluene                         | P                   | S                   | S                   | S                   |
| 27 Triethylamine                   | P                   | P                   | P                   | P                   |
| 28 Triethanolamine                 | P                   | P                   | P                   | P                   |
| 29 CCl <sub>4</sub>                | P                   | P                   | P                   | P                   |
| 30 Cyclohexane                     | G                   | G                   | G                   | S                   |
| 31 Petroleum ether                 | P                   | P                   | P                   | P                   |

\* G = gel; S = solution; P = precipitate; I = insoluble.

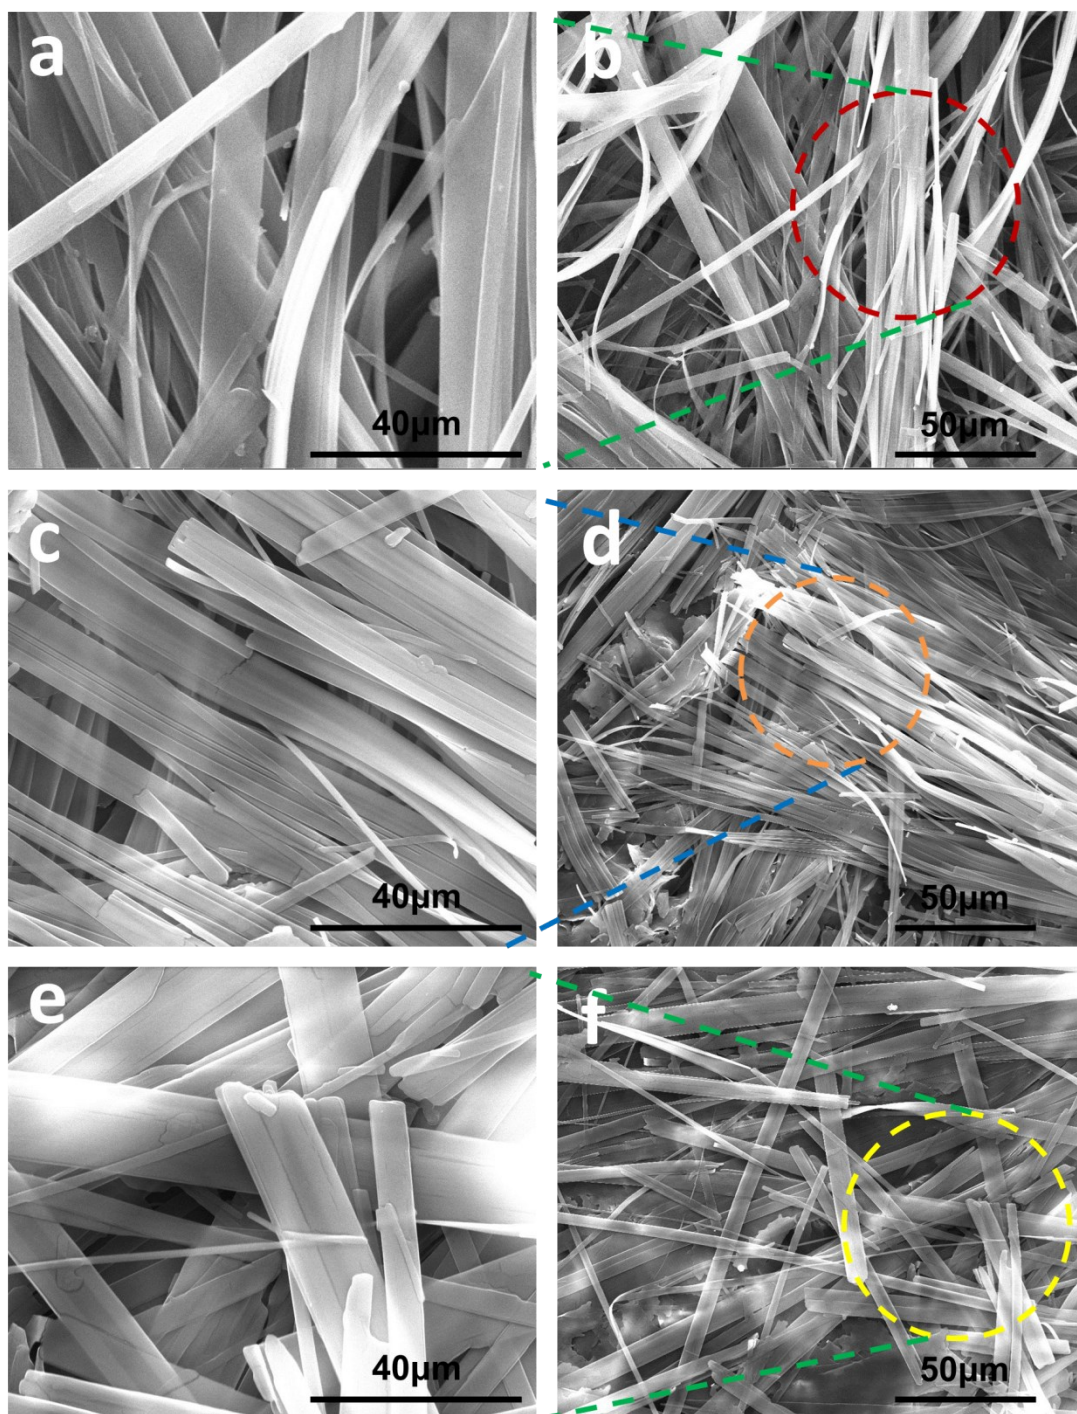

**Figure S1.** FE-SEM images of DPA-R<sub>18</sub> xerogels prepared with various solvents: (a, b) DMSO; (c, d) methanol; (e, f) ethanol.



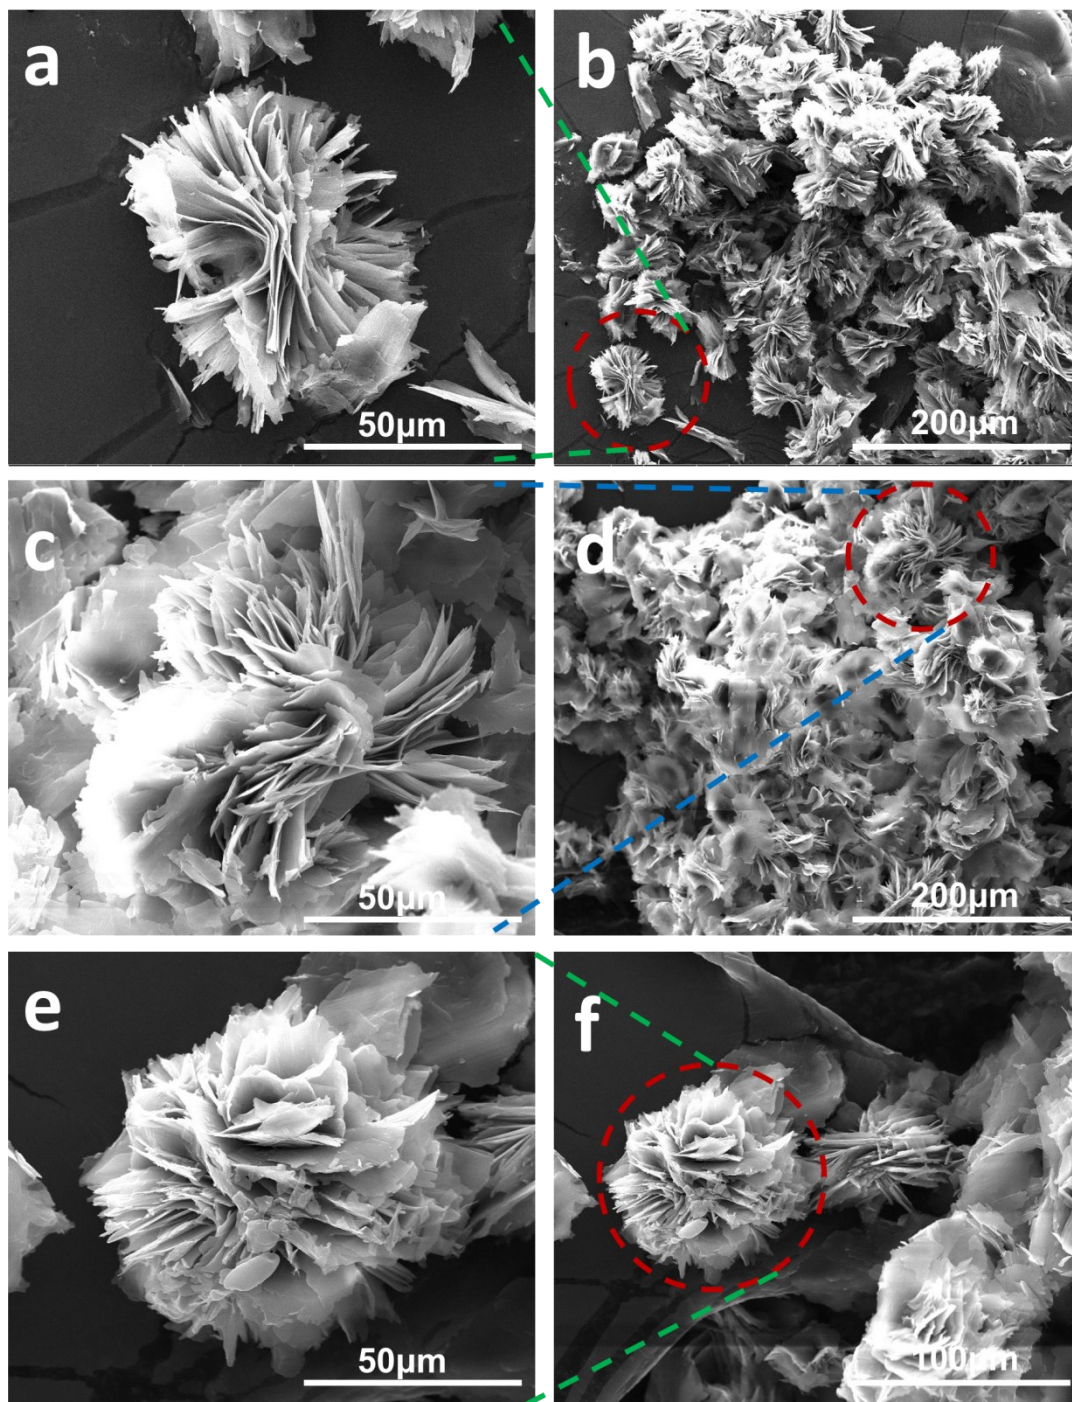

**Figure S2.** FE-SEM images of DPA-R<sub>18</sub> xerogels prepared with various solvents: (a, b) CH<sub>2</sub>Cl<sub>2</sub>; (c, d) pyridine; (e, f) CHCl<sub>3</sub>.

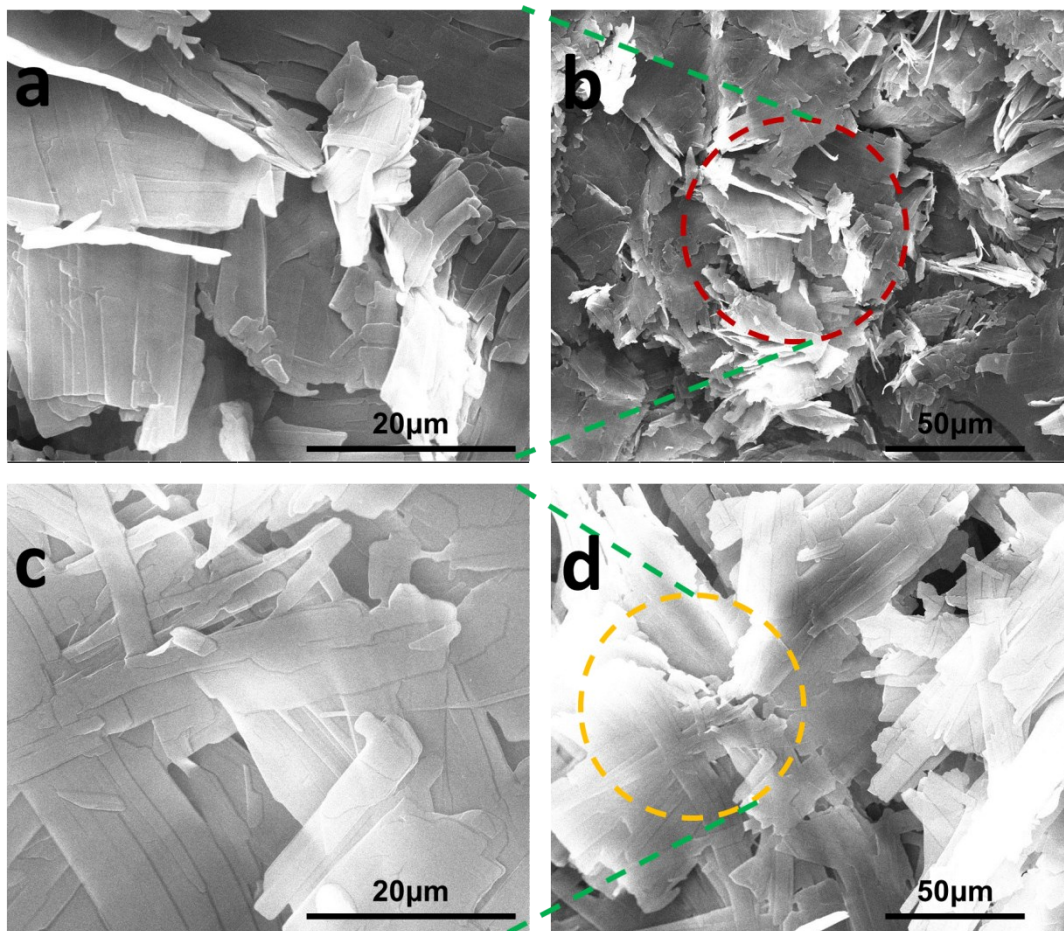

**Figure S3.** FE-SEM images of DPA-R<sub>18</sub> xerogels prepared with various solvents: (a, b) cyclohexane; (c, d) petroleum ether.

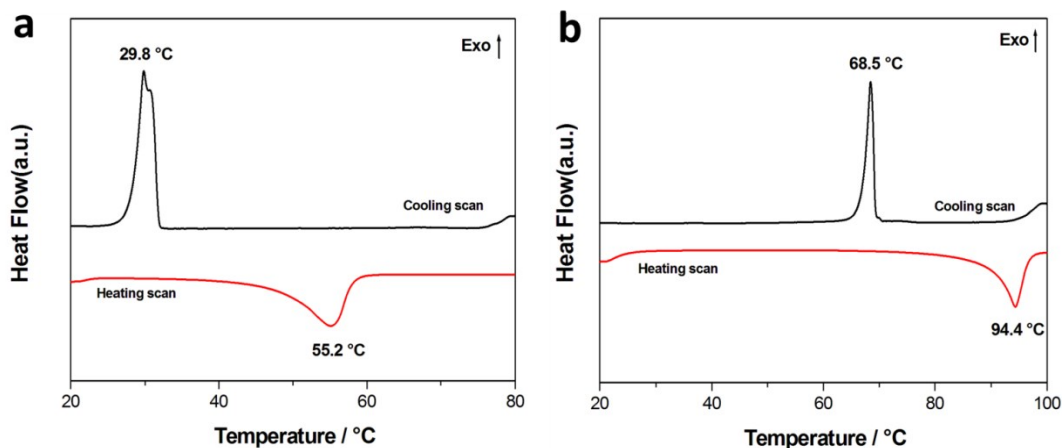

**Figure S4.** DSC thermograms of the gels formed from (a) DPA-R<sub>18</sub> in cyclohexane (7.49 wt.%) and (b) EDA-R<sub>18</sub> in DMF (7.49 wt.%).

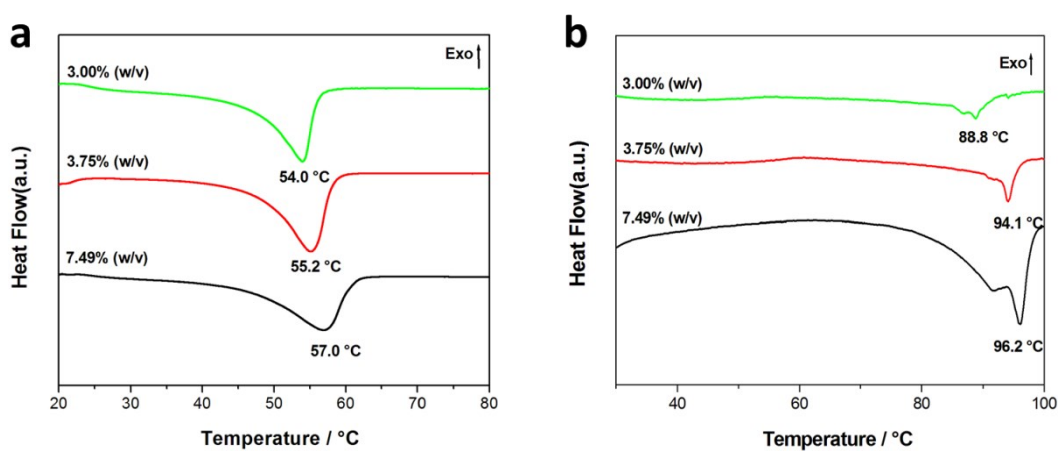

**Figure S5.** DSC thermograms of the gels formed from (a) DPA-R<sub>18</sub> in cyclohexane and (b) EDA-R<sub>18</sub> in DMSO with different gelator concentrations.

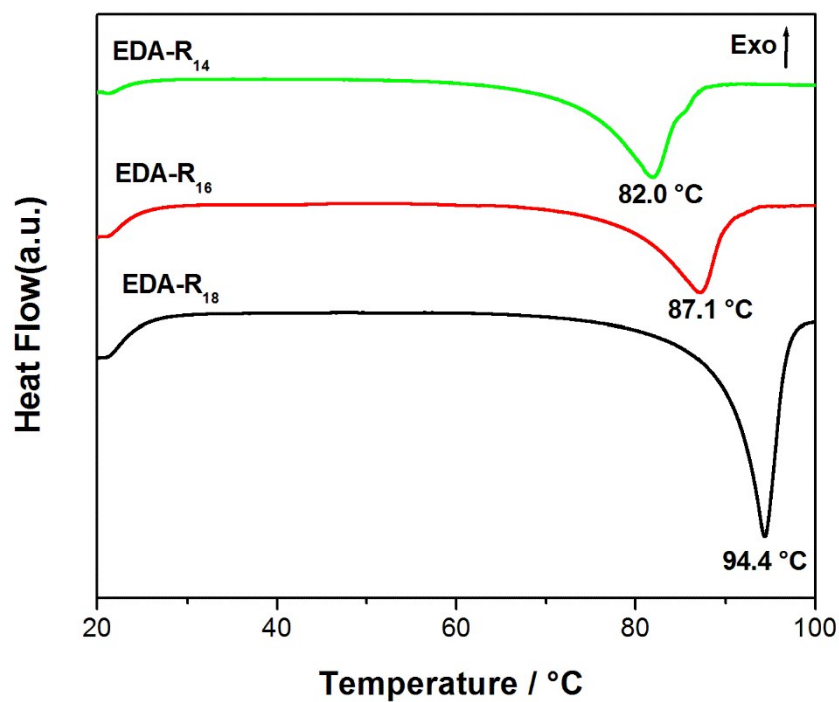

**Figure S6.** DSC thermograms of the gels formed from EDA-R<sub>14</sub>, EDA-R<sub>16</sub> and EDA-R<sub>18</sub> in cyclohexane (7.49 wt.%).

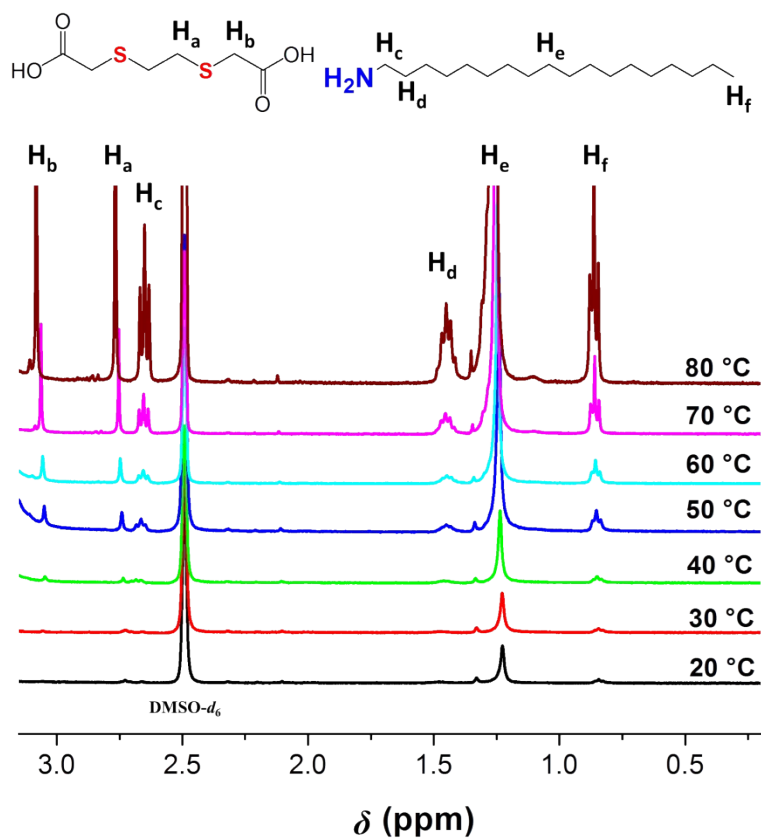

**Figure S7.** Variable-temperature <sup>1</sup>H NMR spectra of the gel formed from EDA-R<sub>18</sub> in DMSO-*d*<sub>6</sub>.



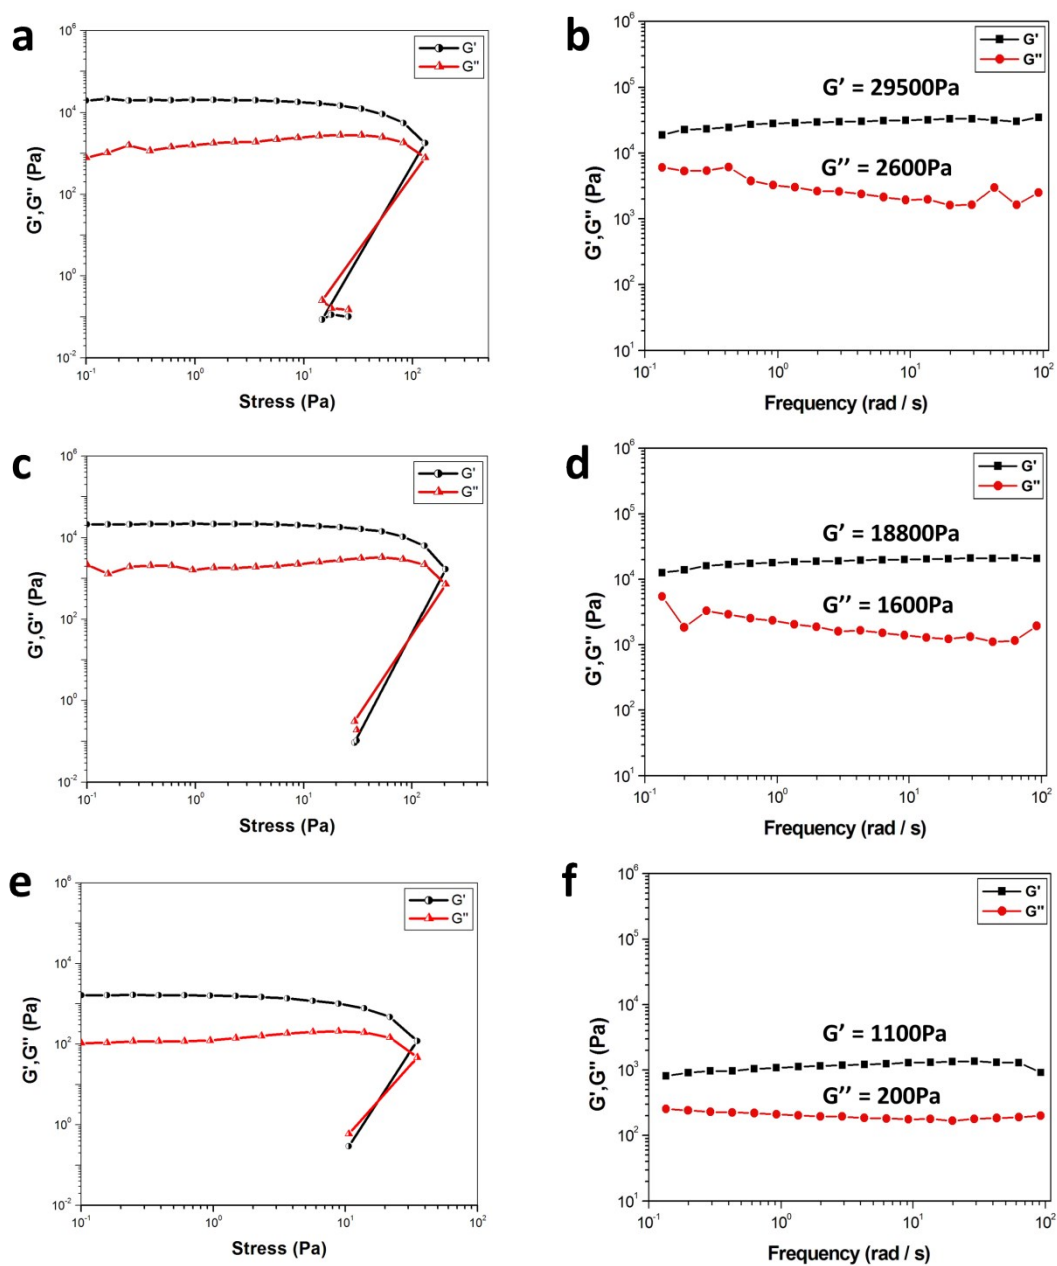

**Figure S8.** Rheological behaviors of the organogels formed separately from DPA-R<sub>18</sub>, DPA-R<sub>16</sub> and DPA-R<sub>14</sub> in DMSO (7.49 wt.%): (a, c, e) strain sweep results and (b, d, f) frequency sweep results at a constant strain of 5Pa.

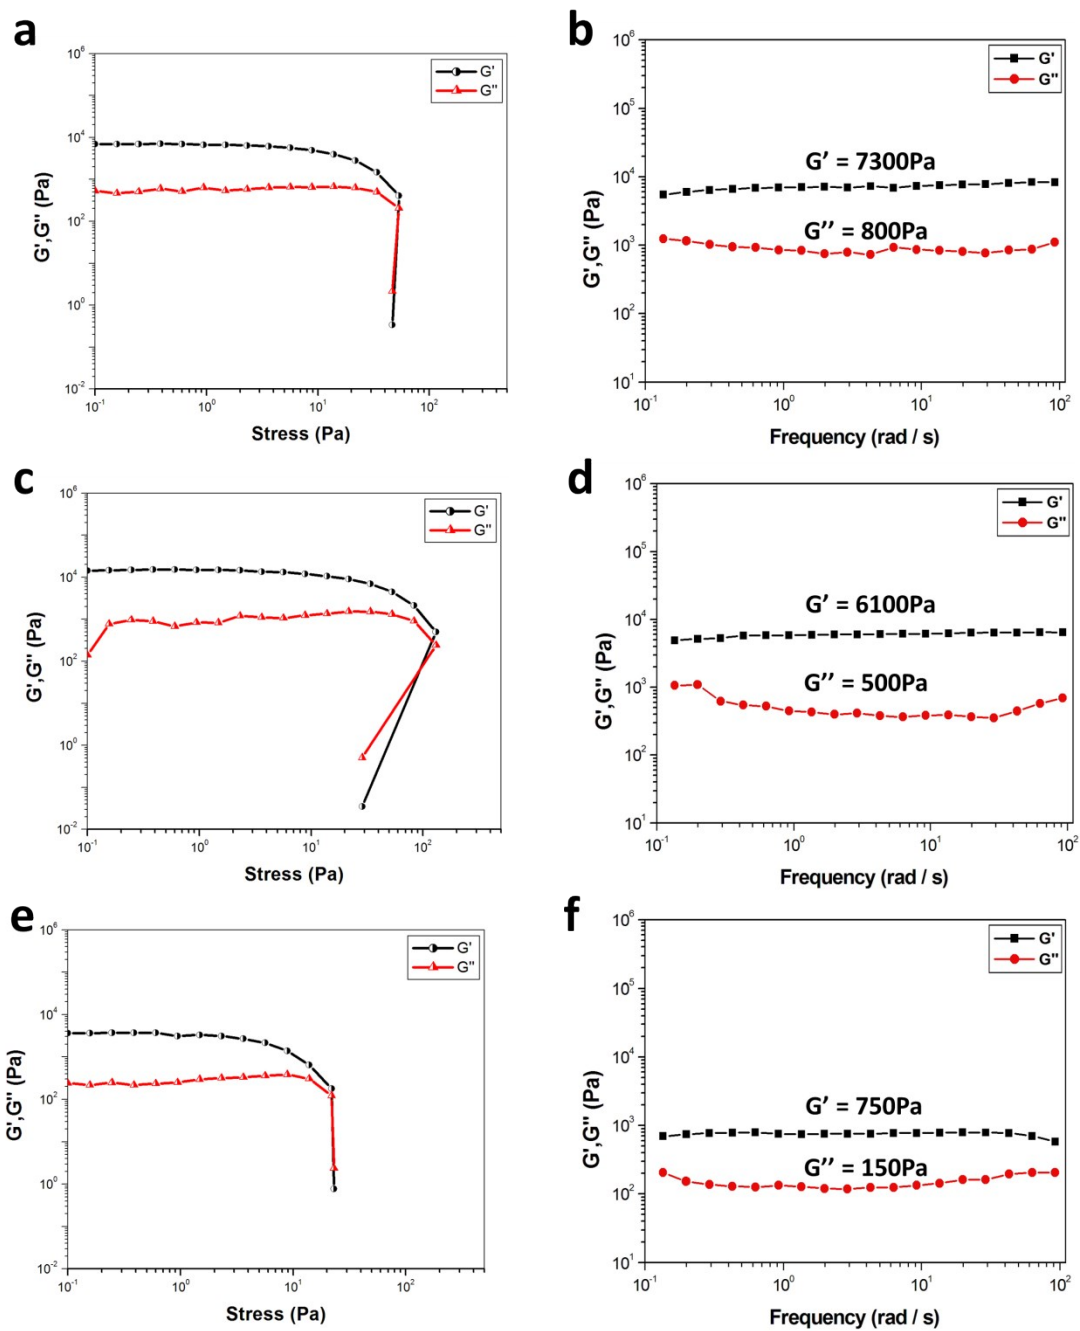

**Figure S9.** Rheological behaviors of the organogels formed separately from EDA-R<sub>18</sub>, EDA-R<sub>16</sub> and EDA-R<sub>14</sub> in DMSO (7.49 wt.%): (a, c, e) strain sweep results and (b, d, f) frequency sweep results at a constant strain of 5Pa.

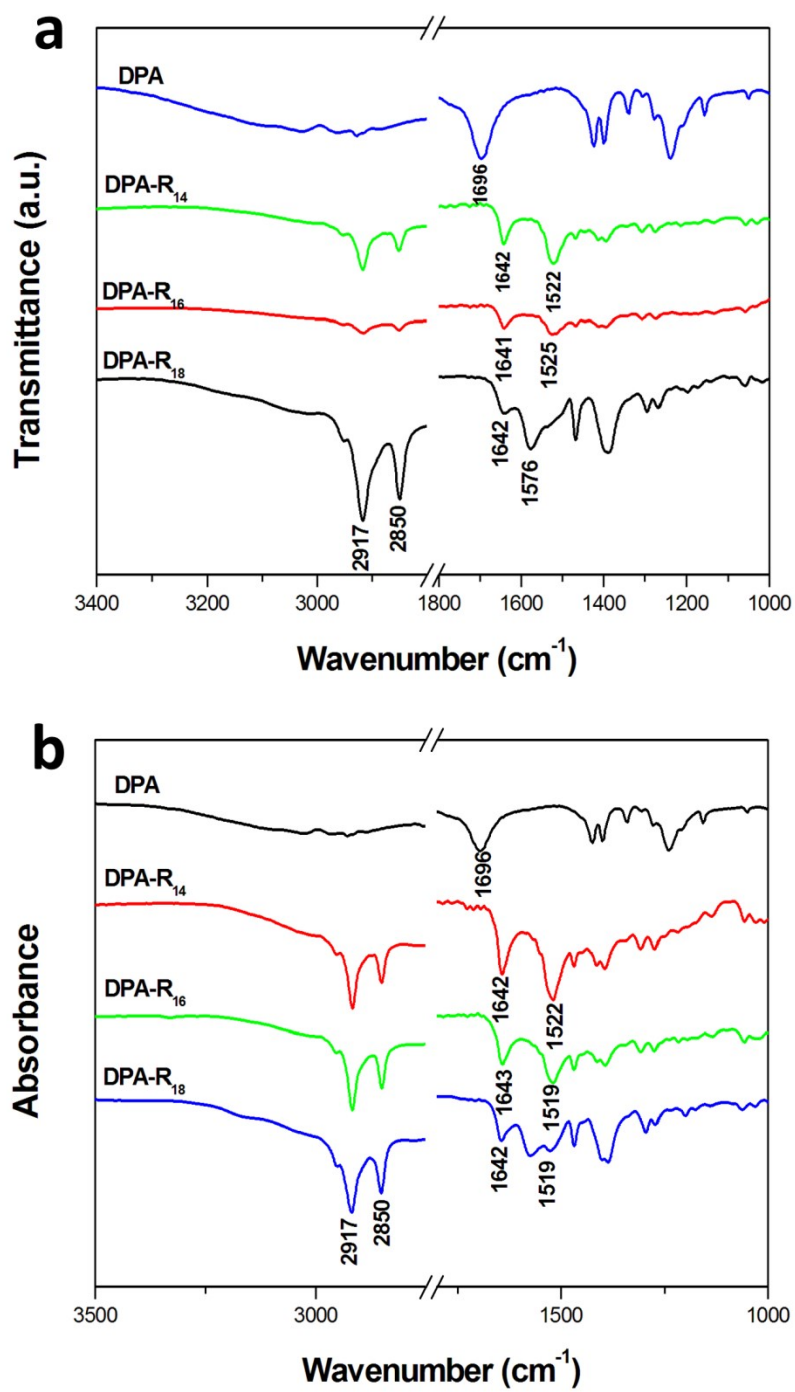

**Figure S10.** FT-IR spectra of DPA and the xerogels formed from DPA-R<sub>n</sub> in (a) CHCl<sub>3</sub> and (b) cyclohexane, respectively.

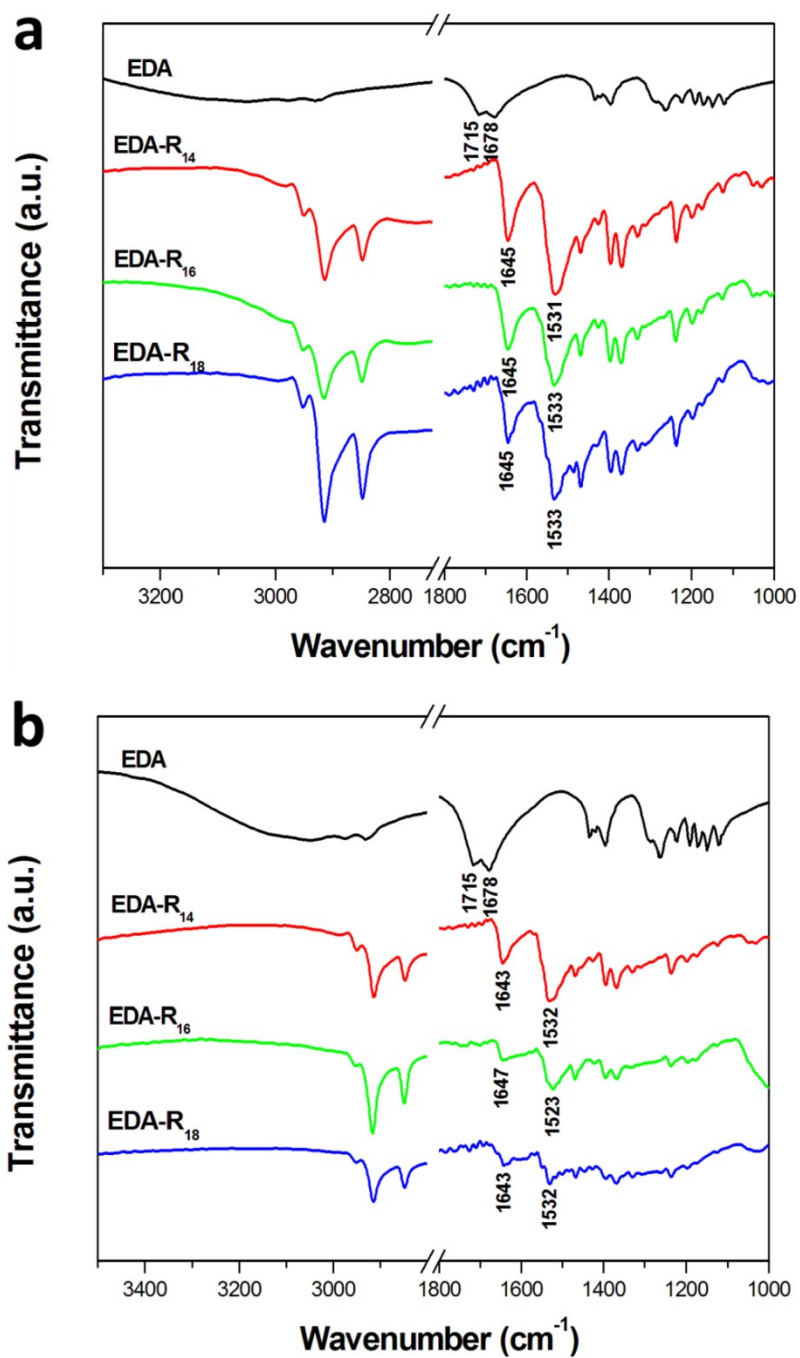

**Figure S11.** FT-IR spectra of EDA and the xerogels formed from EDA-R<sub>n</sub> in (a) DMSO and (b) THF, respectively.

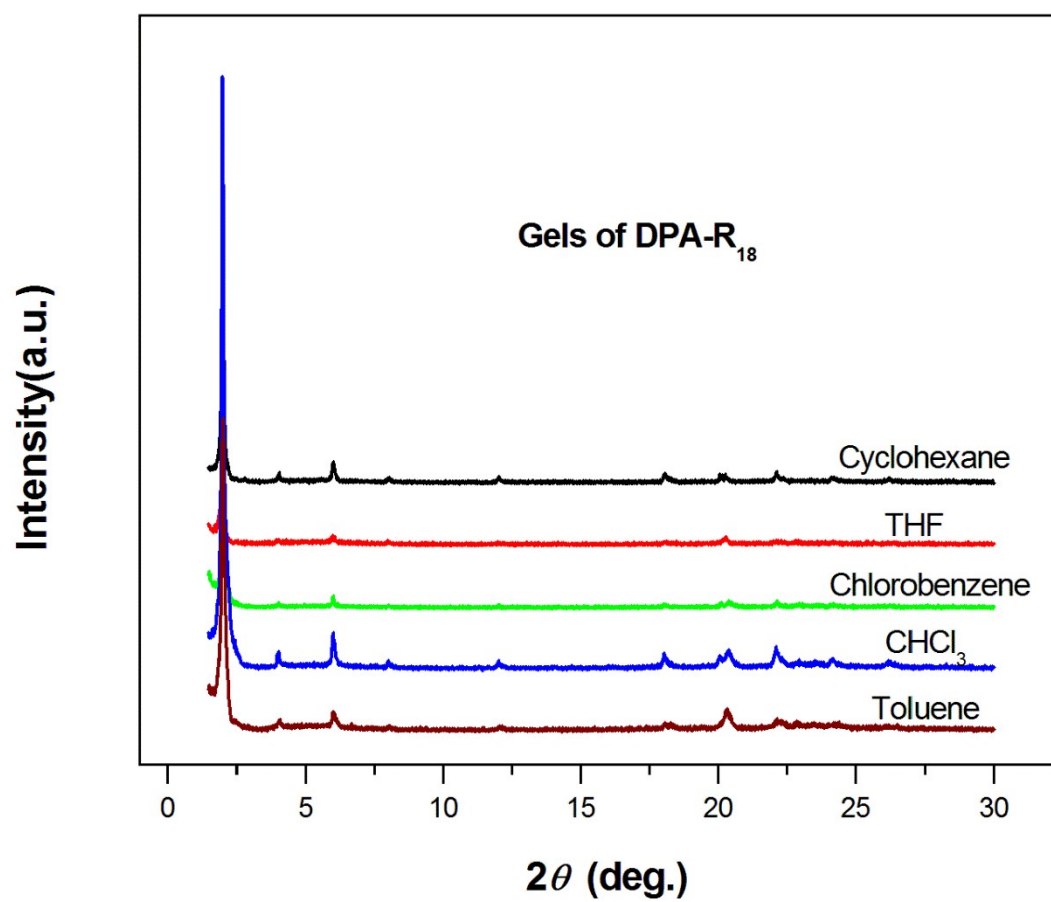

**Figure S12.** XRD patterns of DPA-R<sub>18</sub> xerogels in various organic solvents.
